# Supplementary material
Source: MDPI journal article supplement (https://www.mdpi.com/2072-4292/16/10/1717)
Supplement: s1 [file s1]

# Supplementary Material

## On the Initial Phase of the Ongoing Unrest at Campi Flegrei and Its Relation with Subsidence at Vesuvio (Italy)

A. Amoruso, A. Gualandi, L. Crescentini

This Supplementary Material includes Supplementary Figure S38.

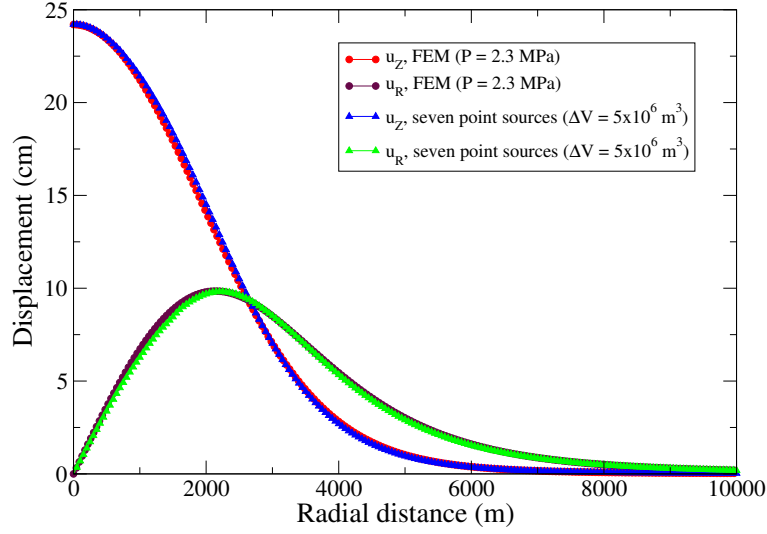

Figure S38: Comparison between the approximated approach in [55], which used seven point sources, and the Finite Element Method (FEM) for calculating the radial and vertical superficial displacements caused by a finite pressurized spheroid with a vertical polar axis. The Figure uses the notations  $u_R$  and  $u_Z$  to indicate the radial and vertical displacements, respectively. The source centre depth is 3100 m, the source equatorial radius is 2500 m, and the source aspect ratio is 0.025. The source strength is presented as overpressure for FEM and as volume change for the seven point-source approximation. The source is embedded in the layered medium utilized in this study (refer to Table 1).
