# Supplementary material
Source: MDPI journal article supplement (https://www.mdpi.com/2072-4292/16/10/1717)
Supplement: s1 [file s1]

# Supplementary Material

On the Initial Phase of the Ongoing Unrest at Campi Flegrei and Its Relation with Subsidence at Vesuvio (Italy)

A. Amoruso, A. Gualandi, L. Crescentini

This Supplementary Material includes Supplementary Figure S1.

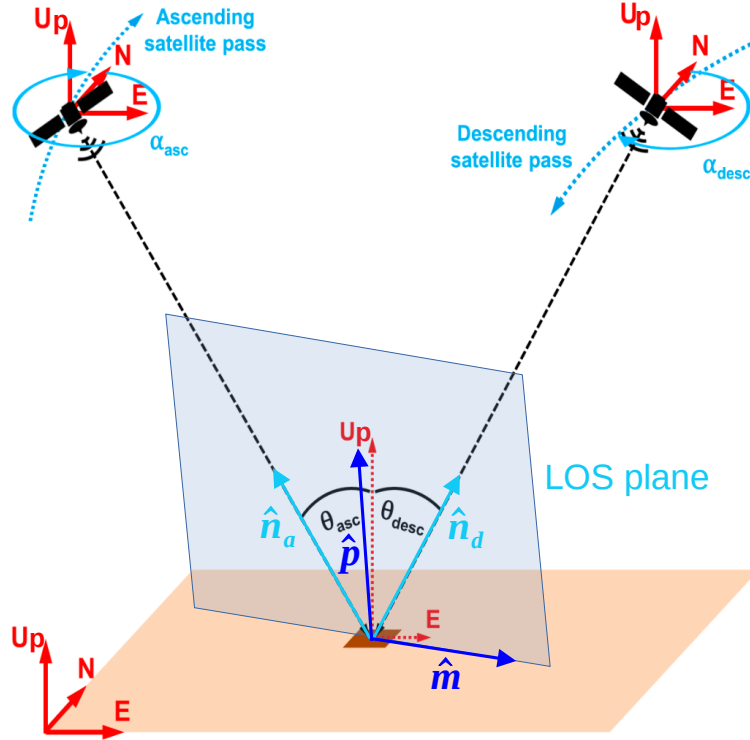

Figure S1: Combination of the line-of-sight (LOS) displacements in order to obtain the unit vector  $\hat{m}$ , which lies at the intersection of the plane of the LOS and the horizontal surface, and the unit vector  $\hat{p}$ , which is perpendicular to  $\hat{m}$  and lies on the plane of the LOS. The unit vector  $\hat{m}$  is used to define the horizontal motion  $u_H$ . The unit vector  $\hat{p}$  is used to define the quasi-vertical displacement  $u_V$ . Modified from [45].
