# Supplementary material
Source: MDPI journal article supplement (https://www.mdpi.com/2072-4292/16/10/1717)
Supplement: s1 [file s1]

# Supplementary Material

On the Initial Phase of the Ongoing Unrest at Campi Flegrei and Its  
Relation with Subsidence at Vesuvio (Italy)

A. Amoruso, A. Gualandi, L. Crescentini

This Supplementary Material includes Supplementary Figure S2.

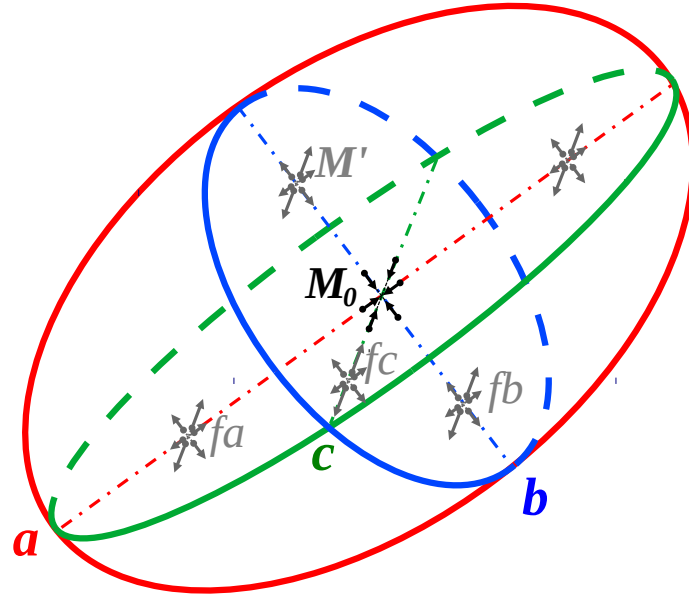

Figure S2: Distribution of the seven groups of three mutually orthogonal vector dipoles which are used to compute the approximate ground deformation caused by a pressurized ellipsoidal cavity.
