# Supplementary material
Source: MDPI journal article supplement (https://www.mdpi.com/2072-4292/16/10/1717)
Supplement: s1 [file s1]

# Supplementary Material

## On the Initial Phase of the Ongoing Unrest at Campi Flegrei and Its Relation with Subsidence at Vesuvio (Italy)

A. Amoruso, A. Gualandi, L. Crescentini

This Supplementary Material includes Supplementary Figure S37.

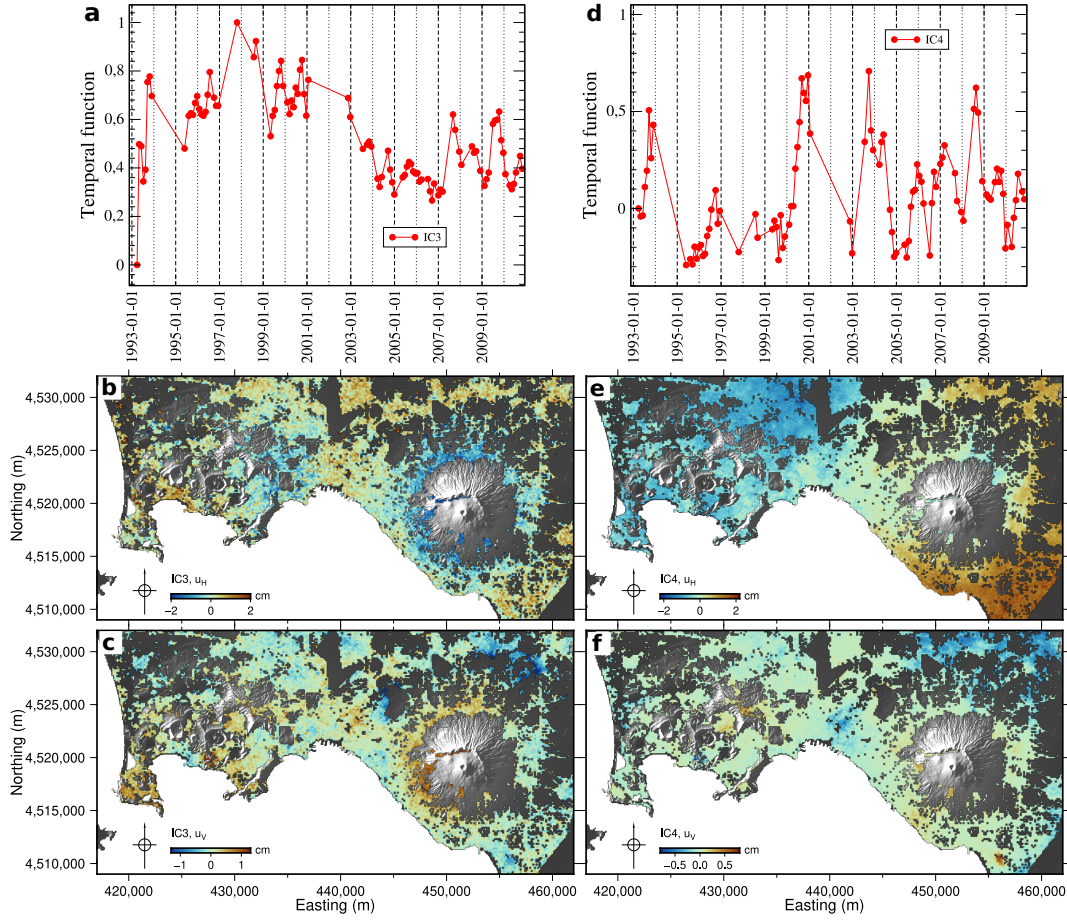

Figure S37: Temporal functions and spatial distributions of IC3 and IC4. Each temporal function starts at zero and the value corresponding to the maximum of its modulus is non-negative. The full range of variation, i.e. the difference between the maximum and minimum of the temporal function, is 1. The spatial distributions are presented in centimetres of displacement during the period when the related temporal function underwent its maximum variation. (a,d) Temporal functions of IC3 and IC4, respectively. (b,c) Spatial distributions of IC3, showing  $u_H$  and  $u_V$ , respectively. (e,f) Spatial distributions of IC4, showing  $u_H$  and  $u_V$ , respectively.
